# Supplementary material for: Low Adherence to the EAT-Lancet Sustainable Reference Diet in the Brazilian Population: Findings from the National Dietary Survey 2017–2018
Source: MDPI journal article supplement (doi:10.3390/nu14061187), 2022-03-11
Supplement: s1 [file s1]

**Supplementary Table S1.** Foods, beverages and ingredients included in the PHDI componentes. Brazilian National Dietary Survey, 2017-2018.

| PHDI components             | Food and beverages                                                                                                                                 |
|-----------------------------|----------------------------------------------------------------------------------------------------------------------------------------------------|
| Nuts and peanuts            | Nuts, almonds, peanuts, and seeds (such as sesame and chia seeds)                                                                                  |
| Legumes                     | Beans, chickpeas, lentils, peas, soy and soy products (tofu, soy milk and textured soy protein)                                                    |
| Fruits                      | All type of fruits, including dry fruits and coconut water. Include fruits used in juices, nectars and punches                                     |
| Vegetables                  | All type of vegetables, excpet tubers                                                                                                              |
| Whole cereals               | Brown rice, whole bread, wheat bran, oatmeal and quinoa                                                                                            |
| Eggs                        | Chicken and other poultry eggs                                                                                                                     |
| Fish and seafood            | Fish and seafood such as squid, shrimp, and crab. Including canned fish and seafood                                                                |
| Tubers and potatoes         | Potatoes, sweet potatoes, yams, cassava and other types                                                                                            |
| Dairy                       | Cow and goat milks, yogurts, and cheeses.                                                                                                          |
| Vegetable oils              | Olive oils, margarine with or without salt, soybean oil, and sunflower oil. Include oils used in recipes                                           |
| Dark green vegetables ratio | All dark green vegetables, such as broccoli, chicory, spinach, cabbage, malabar spinach, and <i>taioba</i>                                         |
| Red-orange vegetables ratio | All red and orange vegetables, such as radish, beet root, squash, pumpkin, and tomato                                                              |
| Red meat                    | Beef, lamb and pork, including their processed meats (e.g., sausage, ham and salami).                                                              |
| Chicken and substitutes     | Chicken and other poultry, including their processed. Includes intakes exceeding the upper limit of eggs and/or fish and seafood                   |
| Animal fats                 | Lard, tallow, butter and other dairy fats (e.g., sour cream and cheese cream)                                                                      |
| Added sugars                | Table white or brown sugar and honey used as ingredients in processed or culinary products and the added sugar to manufactured foods and beverages |

**Supplementary Table S2.** Consumption in calories per day of the food groups that comprises the PHDI according to Brazilian regions. Brazilian National Dietary Survey, 2017-2018.

| PHDI components           | Total |               | North |               | Northeast |               | Southeast |               | South |                | Middle-East |               |
|---------------------------|-------|---------------|-------|---------------|-----------|---------------|-----------|---------------|-------|----------------|-------------|---------------|
|                           | Mean  | 95% CI        | Mean  | 95% CI        | Mean      | 95% CI        | Mean      | 95% CI        | Mean  | 95% CI         | Mean        | 95% CI        |
| Nuts and peanuts          | 5.76  | 5.16 – 6.37   | 12.3  | 9.33 – 15.3   | 6.96      | 5.98 – 7.93   | 4.02      | 3.07 – 4.97   | 4.56  | 3.46 – 5.66    | 6.53        | 3.98 – 9.08   |
| Legumes                   | 114.8 | 112.1 – 117.5 | 89.8  | 82.8 – 96.9   | 116.7     | 112.5 – 120.9 | 123.4     | 118.3 – 128.5 | 92.0  | 86.2 – 97.8    | 120.2       | 122.7 – 137.6 |
| Fruits                    | 92.7  | 90.2 – 95.2   | 118.4 | 105.5 – 131.2 | 88.3      | 84.6 – 91.9   | 85.1      | 81.0 – 89.3   | 111.2 | 105.5 – 116.9  | 88.0        | 82.2 – 93.8   |
| Vegetables                | 36.4  | 35.5 – 37.3   | 34.8  | 32.3 – 37.3   | 30.1      | 28.9 – 31.3   | 39.9      | 38.1 – 41.6   | 36.9  | 35.1 – 38.6    | 40.1        | 38.1 – 42.1   |
| Whole cereals             | 12.2  | 11.3 – 13.2   | 19.2  | 15.3 – 23.2   | 7.79      | 6.84 – 8.75   | 12.0      | 10.2 – 13.8   | 18.7  | 15.7 – 21.7    | 9.39        | 7.24 – 11.5   |
| Eggs                      | 24.2  | 23.2 – 25.1   | 21.5  | 18.5 – 24.4   | 29.8      | 28.2 – 31.4   | 21.8      | 20.1 – 23.6   | 23.0  | 21.2 – 24.8    | 22.2        | 19.9 – 24.5   |
| Fish and seafood          | 21.4  | 19.8 – 22.9   | 66.1  | 57.3 – 75.0   | 29.7      | 26.8 – 32.6   | 11.5      | 9.33 – 13.7   | 12.7  | 9.61 – 15.8    | 14.8        | 11.1 – 18.5   |
| Tubers and potatoes       | 68.0  | 65.3 – 70.7   | 154.7 | 141.1 – 168.3 | 89.1      | 84.2 – 94.1   | 43.9      | 39.9 – 47.8   | 55.8  | 49.8 – 61.9    | 58.4        | 52.3 – 64.5   |
| Dairy                     | 109.3 | 106.4 – 112.3 | 74.6  | 68.5 – 80.8   | 94.2      | 89.9 – 98.5   | 120.2     | 114.8 – 125.6 | 132.3 | 123.8 – 140.8  | 96.1        | 89.4 – 102.8  |
| Vegetable oils            | 214.0 | 210.2 – 217.7 | 203.3 | 193.0 – 213.6 | 180.5     | 175.6 – 185.3 | 229.4     | 222.4 – 236.5 | 223.1 | 214.0 – 2323.2 | 239.9       | 229.3 – 250.6 |
| Dark green vegetables     | 1.64  | 1.50 – 1.78   | 0.67  | 0.51 – 0.83   | 0.59      | 0.52 – 0.66   | 2.43      | 2.12 – 2.73   | 1.99  | 1.63 – 2.35    | 1.30        | 1.07 – 1.54   |
| Red and orange vegetables | 9.41  | 9.05 – 9.78   | 6.78  | 5.95 – 7.62   | 6.48      | 6.10 – 6.87   | 9.97      | 9.25 – 10.7   | 13.2  | 12.2 – 14.1    | 12.4        | 11.4 – 13.4   |
| Red meat                  | 221.9 | 216.9 – 226.9 | 237.5 | 222.1 – 253.0 | 205.9     | 197.6 – 214.3 | 201.5     | 193.3 – 209.7 | 258.0 | 243.9 – 272.1  | 306.6       | 289.5 – 323.8 |
| Chicken and substitutes   | 94.6  | 91.3 – 97.9   | 109.6 | 98.2 – 120.9  | 117.5     | 112.0 – 123.1 | 85.7      | 79.9 – 91.6   | 79.5  | 72.7 – 86.3    | 75.3        | 67.9 – 82.6   |
| Animal fats               | 20.5  | 19.2:21.8     | 16.9  | 14.0:19.8     | 17.8      | 16.0:19.6     | 23.3      | 20.7:25.9     | 20.1  | 17.3:22.8      | 18.7        | 16.1:21.3     |
| Added sugars              | 175.8 | 172.3 – 179.4 | 141.9 | 132.4 – 151.5 | 188.5     | 182.7 – 194.4 | 167.8     | 161.5 – 174.0 | 202.8 | 193.6 – 212.0  | 161.2       | 152.6 – 169.8 |
